# Supplementary material for: Altered fecal microbiota composition in individuals who abuse methamphetamine
Source: PubMed Central journal article supplement (PMC8437956; doi:10.1038/s41598-021-97548-1), 2021-09-13
Supplement: 41598_2021_97548_MOESM1_ESM.pdf [file 41598_2021_97548_MOESM1_ESM.pdf]

**Supplementary Fig 1 Overall structure of the fecal bacterial communities.**

(a) The rarefaction curve of the number of OTUs. The x-coordinate is the number of sequencing bars randomly selected from a sample, and the y-coordinate is the number of OTUs that can be constructed based on the sequencing bars, which is used to reflect the depth of sequencing. Different samples are represented by different-colored curves. (b) Rank abundance of the METH and Ctr groups. The x-coordinate is the ordinal number sorted by OTU abundance, and the y-coordinate is the relative abundance of the corresponding OTUs. Different samples are represented by dashed lines of different colors. The FB samples belong to the METH group; the FBC samples belong to the Ctr group. (c) Venn diagram based on OTU clustering. Each circle represents a group, the number of OTUs in the overlapping regions of the circles represents the number of common OTUs between the two groups, and the number of OTUs in non-overlapping regions represents the number of unique OTUs in each group.

**Supplementary Fig 2 Gut microbiota may be associated with age and the duration of METH use.** (a), (c), (e), (g) Correlation between age and the relative abundance of the taxa in phylum, class, order and family level respectively. (b), (d), (f), (h) Correlation between duration of the METH use and the relative abundance of the taxa in phylum, class, order and family level respectively.

**Supplementary Fig 3 Positive symptoms of schizophrenia were related to gut microbiota.** (a)-(e) Bacterial taxa were correlated with delusions, suspiciousness and total positive scale respectively.

**Supplementary Fig 4 Negative symptoms of schizophrenia were related to gut microbiota.** (a)-(o) Bacterial taxa were correlated with blunted affect, emotional withdrawal, passive-apatetic social withdrawal, difficulty in abstract thinking, lack of spontaneity & flow of conversation and total negative scale respectively.

**Supplementary Fig 5 General psychopathology and cognition were related to gut microbiota were related to gut microbiota. (a)-(h)** Bacterial taxa were correlated with motor retardation, unusual thought content, poor impulse control, active social avoidance, general psychopathology scale and abstraction respectively.

**We mainly recruited the patients with methamphetamine use disorder (MUD) in our research. The MUD is diagnosed based on the Diagnostic and Statistical Manual of Mental Disorders 5 (DSM-5) by the consensus of two psychiatrists. The details are as followed:**

The Diagnostic Criteria of MUD

A pattern of amphetamine-type substance, cocaine, or other stimulant use leading to clinically significant impairment or distress, as manifested by at least two of the following, occurring within a 12-month period:

1. The stimulant is often taken in larger amounts or over a longer period than was intended.
2. There is a persistent desire or unsuccessful efforts to cut down or control stimulant use.
3. A great deal of time is spent in activities necessary to obtain the stimulant, use the stimulant, or recover from its effects.
4. Craving, or a strong desire or urge to use the stimulant.
5. Recurrent stimulant use resulting in a failure to fulfill major role obligations at work, school, or home.
6. Continued stimulant use despite having persistent or recurrent social or interpersonal problems caused or exacerbated by the effects of the stimulant.
7. Important social, occupational, or recreational activities are given up or reduced because of stimulant use.
8. Recurrent stimulant use in situations in which it is physically hazardous.
9. Stimulant use is continued despite knowledge of having a persistent or recurrent

physical or psychological problem that is likely to have been caused or exacerbated by the stimulant.

10. Tolerance, as defined by either of the following:

- a. A need for markedly increased amounts of the stimulant to achieve intoxication or desired effect.
- b. A markedly diminished effect with continued use of the same amount of the stimulant.

Note: This criterion is not considered to be met for those taking stimulant medications solely under appropriate medical supervision, such as medications for attention-deficit/hyperactivity disorder or narcolepsy.

11. Withdrawal, as manifested by either of the following:

- a. The characteristic withdrawal syndrome for the stimulant (refer to Criteria A and B of the criteria set for stimulant withdrawal, p. 569).
- b. The stimulant (or a closely related substance) is taken to relieve or avoid withdrawal symptoms.

Supplementary Table 1. Comparison of alpha diversity under the 97% consistency threshold in the two groups.

| group | observed_species | shannon | simpson | chao1   | ACE     | goods_coverage |
|-------|------------------|---------|---------|---------|---------|----------------|
| Ctr   | 325              | 5.206   | 0.932   | 369.952 | 382.298 | 0.999          |
| METH  | 306              | 4.935*  | 0.922   | 342.294 | 354.654 | 0.999          |

cutoff=57339

Wilcoxon rank-sum test, \*p<0.05

Supplementary Table 2. Relative abundance of top ten microbes of different levels in two groups.

| phylum                |          |          |
|-----------------------|----------|----------|
| Taxonomy              | METH     | Ctr      |
| Firmicutes            | 0.691129 | 0.633175 |
| Proteobacteria        | 0.089046 | 0.103454 |
| Actinobacteria        | 0.13697  | 0.09035  |
| Bacteroidetes         | 0.075762 | 0.162449 |
| Fusobacteria          | 0.006247 | 0.009618 |
| Euryarchaeota         | 0.00017  | 0        |
| unidentified_Bacteria | 0.000343 | 0.000443 |
| Tenericutes           | 0.000013 | 0.000072 |
| Verrucomicrobia       | 0.000081 | 0.000035 |
| Acidobacteria         | 0.000087 | 0.000096 |
| Others                | 0.000152 | 0.000308 |

| class                       |          |          |
|-----------------------------|----------|----------|
| Taxonomy                    | METH     | CTR      |
| Clostridia                  | 0.606823 | 0.541457 |
| Gammaproteobacteria         | 0.088193 | 0.102084 |
| Bacteroidia                 | 0.075668 | 0.162105 |
| unidentified_Actinobacteria | 0.092859 | 0.069014 |
| Coriobacteriia              | 0.043815 | 0.021174 |
| Negativicutes               | 0.035908 | 0.055461 |
| Bacilli                     | 0.036147 | 0.022614 |
| Fusobacteriia               | 0.006238 | 0.009607 |
| Erysipelotrichia            | 0.012575 | 0.014011 |
| Deltaproteobacteria         | 0.000543 | 0.001186 |
| Others                      | 0.001232 | 0.001285 |

## order

| Taxonomy                             | METH     | CTR      |
|--------------------------------------|----------|----------|
| Clostridiales                        | 0.606812 | 0.541431 |
| Enterobacteriales                    | 0.08599  | 0.094846 |
| Bacteroidales                        | 0.075648 | 0.162093 |
| Bifidobacteriales                    | 0.092374 | 0.068532 |
| Coriobacteriales                     | 0.043811 | 0.021173 |
| Selenomonadales                      | 0.035908 | 0.055461 |
| Lactobacillales                      | 0.036059 | 0.022525 |
| Fusobacteriales                      | 0.006238 | 0.009607 |
| Erysipelotrichales                   | 0.012575 | 0.014011 |
| unidentified_<br>Gammaproteobacteria | 0.001267 | 0.00683  |
| Others                               | 0.003319 | 0.003491 |

## family

| Taxonomy              | METH     | CTR      |
|-----------------------|----------|----------|
| Lachnospiraceae       | 0.321415 | 0.286737 |
| Enterobacteriaceae    | 0.08599  | 0.094846 |
| Ruminococcaceae       | 0.181135 | 0.188753 |
| Bacteroidaceae        | 0.059185 | 0.116566 |
| Bifidobacteriaceae    | 0.092374 | 0.068532 |
| Peptostreptococcaceae | 0.079787 | 0.054748 |
| Coriobacteriaceae     | 0.041497 | 0.019457 |
| Veillonellaceae       | 0.03235  | 0.054599 |
| Streptococcaceae      | 0.032094 | 0.021339 |
| Fusobacteriaceae      | 0.006238 | 0.009607 |
| Others                | 0.067936 | 0.084816 |

## genus

| Taxonomy                        | METH     | CTR      |
|---------------------------------|----------|----------|
| unidentified_Enterobacteriaceae | 0.071641 | 0.083155 |
| unidentified_Ruminococcaceae    | 0.056424 | 0.041479 |
| Bacteroides                     | 0.059185 | 0.116566 |
| Blautia                         | 0.117765 | 0.10988  |
| Bifidobacterium                 | 0.092346 | 0.068528 |
| Faecalibacterium                | 0.079266 | 0.106997 |
| Romboutsia                      | 0.073408 | 0.039146 |
| Collinsella                     | 0.041485 | 0.019456 |
| Megamonas                       | 0.006586 | 0.012668 |
| unidentified_Lachnospiraceae    | 0.071749 | 0.059381 |
| Others                          | 0.330146 | 0.342746 |

| species                           |          |          |
|-----------------------------------|----------|----------|
| Taxonomy                          | METH     | CTR      |
| Escherichia_coli                  | 0.071641 | 0.083155 |
| Ruminococcus_bromii               | 0.043127 | 0.019636 |
| Bifidobacterium_pseudocatenulatum | 0.082387 | 0.051101 |
| Collinsella_aerofaciens           | 0.041114 | 0.018949 |
| Ruminococcus_sp_5_1_39BFAA        | 0.078941 | 0.064517 |
| Bacteroides_plebeius              | 0.016    | 0.002601 |
| Dialister_succinatiphilus         | 0.004137 | 0.01129  |
| Fusobacterium_sp_RMA_1065         | 0.005827 | 0.009355 |
| [Ruminococcus]_gnavus             | 0.014659 | 0.010364 |
| Bacteroides_vulgatus              | 0.015938 | 0.035737 |
| Others                            | 0.626229 | 0.693297 |

Supplementary Table 3. MetaStat of microbes with significant difference between the METH and Ctr groups.

| class                                                                           |               |                   |                        |                 |                    |                             |              |              |
|---------------------------------------------------------------------------------|---------------|-------------------|------------------------|-----------------|--------------------|-----------------------------|--------------|--------------|
| Taxa                                                                            | mean<br>(Ctr) | variance<br>(Ctr) | standard<br>error(Ctr) | mean<br>(METH)  | variance<br>(METH) | standard<br>error<br>(METH) | p<br>value   | q<br>value   |
| k__Bacteria;p__Proteobacteria; c__Deltaproteobacteria;                          | 0.001168489   | 3.18E-07          | 0.00015079             | 0.00053<br>0834 | 7.37E-08           | 6.79E-05                    | 0.000<br>999 | 0.028<br>971 |
| Order                                                                           |               |                   |                        |                 |                    |                             |              |              |
| Taxa                                                                            | mean(Ctr)     | variance(<br>Ctr) | standard<br>error(Ctr) | mean(M<br>ETH)  | variance<br>(METH) | standard<br>error<br>(METH) | p<br>value   | q<br>value   |
| k__Bacteria;p__Proteobacteria;c__<br>Deltaproteobacteria;o__Desulfovibrionales; | 0.001159769   | 3.19E-07          | 0.00015102             | 5.09E-<br>04    | 6.63E-08           | 6.44E-05                    | 0.000<br>999 | 0.020<br>979 |
| k__Bacteria;p__Proteobacteria;c__<br>Gammaproteobacteria;o__Xanthomonadales;    | 3.11E-05      | 5.23E-10          | 6.11E-06               | 7.74E-<br>05    | 3.85E-09           | 1.55E-05                    | 0.000<br>999 | 0.020<br>979 |
| k__Bacteria;p__Proteobacteria;c__<br>Alphaproteobacteria;o__Sphingomonadales;   | 5.11E-05      | 3.96E-10          | 5.32E-06               | 9.16E-<br>05    | 9.53E-10           | 7.72E-06                    | 0.000<br>999 | 0.020<br>979 |

| Family                                                                                              |             |               |                     |            |                 |                       |          |          |  |
|-----------------------------------------------------------------------------------------------------|-------------|---------------|---------------------|------------|-----------------|-----------------------|----------|----------|--|
| Taxa                                                                                                | mean(Ctr)   | variance(Ctr) | standard error(Ctr) | mean(METH) | variance (METH) | standard error (METH) | p value  | q value  |  |
| k__Bacteria;p__Bacteroidetes;c__Bacteroidia;o__Bacteroidales;f__Rikenellaceae;                      | 0.020880827 | 0.000488668   | 0.00590803          | 3.33E-03   | 6.24E-06        | 6.25E-04              | 0.000999 | 0.018815 |  |
| k__Bacteria;p__Firmicutes;c__Clostridia;o__Clostridiales;f__unidentified__Clostridiales;            | 6.72E-03    | 1.88E-05      | 1.16E-03            | 2.19E-02   | 2.44E-04        | 3.90E-03              | 0.000999 | 0.018815 |  |
| k__Bacteria;p__Bacteroidetes;c__Bacteroidia;o__Bacteroidales; f__Tannerellaceae;                    | 1.63E-02    | 1.53E-04      | 3.31E-03            | 4.80E-03   | 1.74E-05        | 1.04E-03              | 0.001998 | 0.032253 |  |
| k__Bacteria;p__Firmicutes;c__Bacilli;o__Lactobacillales;f__Lactobacillaceae;                        | 8.99E-04    | 1.87E-07      | 1.15E-04            | 3.73E-03   | 6.36E-06        | 6.30E-04              | 0.000999 | 0.018815 |  |
| k__Bacteria;p__Proteobacteria;c__Deltaproteobacteria;o__Desulfovibrionales; f__Desulfovibrionaceae; | 1.16E-03    | 3.19E-07      | 1.51E-04            | 5.09E-04   | 6.63E-08        | 6.44E-05              | 0.000999 | 0.018815 |  |
| k__Bacteria;p__Proteobacteria;c__Gammaproteobacteria;o__Xanthomonadales; f__Xanthomonadaceae;       | 3.11E-05    | 5.23E-10      | 6.11E-06            | 7.30E-05   | 2.52E-09        | 1.26E-05              | 0.002997 | 0.042333 |  |
| k__Bacteria;p__Proteobacteria;c__Alphaproteobacteria;o__Sphingomonadales; f__Sphingomonadaceae;     | 5.11E-05    | 3.96E-10      | 5.32E-06            | 9.16E-05   | 9.53E-10        | 7.72E-06              | 0.000999 | 0.018815 |  |
| k__Bacteria;p__Firmicutes;c__Clostridia;o__Clostridiales;f__Peptococcaceae;                         | 0.00E+00    | 0.00E+00      | 0.00E+00            | 1.31E-05   | 5.47E-10        | 5.85E-06              | 0.000636 | 0.018815 |  |



| Genus                                                                                                                       |             |               |                     |             |                |                      |          |          |
|-----------------------------------------------------------------------------------------------------------------------------|-------------|---------------|---------------------|-------------|----------------|----------------------|----------|----------|
| Taxa                                                                                                                        | mean(Ctr)   | variance(Ctr) | standard error(Ctr) | mean(METH)  | variance(METH) | standard error(METH) | p value  | q value  |
| k__Bacteria;p__Bacteroidetes;c__Bacteroidia;o__Bacteroidales;f__Rikenellaceae;g__Alistipes;                                 | 0.02078366  | 0.000486976   | 0.00589779          | 3.32E-03    | 6.23E-06       | 6.24E-04             | 0.000999 | 0.023876 |
| k__Bacteria;p__Firmicutes;c__Clostridia;o__Clostridiales;f__unidentified_Clostridiales;g__unidentified_Clostridiales;       | 0.006480257 | 1.85E-05      | 0.00115012          | 2.17E-02    | 2.41E-04       | 3.88E-03             | 0.000999 | 0.023876 |
| k__Bacteria;p__Firmicutes;c__Clostridia;o__Clostridiales;f__Lachnospiraceae;g__Roseburia;                                   | 6.11E-03    | 1.64E-05      | 1.08E-03            | 0.01536912  | 0.0001274      | 0.002822             | 0.001998 | 0.034109 |
| k__Bacteria;p__Bacteroidetes;c__Bacteroidia;o__Bacteroidales;f__Tannerellaceae;g__Parabacteroides;                          | 1.63E-02    | 1.53E-04      | 3.31E-03            | 0.004798218 | 1.74E-05       | 0.001043             | 0.002997 | 0.044768 |
| k__Bacteria;p__Proteobacteria;c__Gammaproteobacteria;o__unidentified_Gammaproteobacteria;f__Burkholderiaceae;g__Sutterella; | 2.14E-03    | 9.62E-06      | 8.29E-04            | 0.000252882 | 7.92E-08       | 7.04E-05             | 0.000999 | 0.023876 |
| k__Bacteria;p__Firmicutes;c__Clostridia;o__Clostridiales;f__Lachnospiraceae;g__Lachnospira;                                 | 4.07E-03    | 5.11E-06      | 6.04E-04            | 0.001979456 | 1.84E-06       | 0.000339             | 0.001998 | 0.034109 |

---

|                                                                                                                       |             |          |            |                 |          |          |              |              |
|-----------------------------------------------------------------------------------------------------------------------|-------------|----------|------------|-----------------|----------|----------|--------------|--------------|
| k__Bacteria;p__Firmicutes;c__Bacilli;o__Lactobacillales;f__Lactobacillaceae; g__Lactobacillus;                        | 8.99E-04    | 1.87E-07 | 1.15E-04   | 0.00373<br>3279 | 6.36E-06 | 0.00063  | 0.000<br>999 | 0.023<br>876 |
| k__Bacteria;p__Firmicutes;c__Negativicutes; o__Selenomonadales; f__Veillonellaceae;g__Mitsuokella;                    | 6.60E-05    | 4.72E-08 | 5.80E-05   | 0.00347<br>1677 | 1.31E-05 | 0.000905 | 0.001<br>998 | 0.034<br>109 |
| k__Bacteria;p__Bacteroidetes;c__Bacteroidia;o__Bacteroidales;f__Marinifilaceae;g__Butyricimonas;                      | 1.08E-03    | 4.22E-06 | 5.49E-04   | 9.05E-<br>05    | 1.07E-08 | 2.59E-05 | 0.000<br>999 | 0.023<br>876 |
| k__Bacteria;p__Firmicutes;c__Bacilli; o__Lactobacillales;f__Streptococcaceae; g__Lactococcus;                         | 0.000626599 | 5.14E-07 | 0.00019167 | 8.94E-<br>05    | 1.65E-08 | 3.22E-05 | 0.000<br>999 | 0.023<br>876 |
| k__Bacteria;p__Proteobacteria; c__Deltaproteobacteria;o__Desulfovibrionales; f__Desulfovibrionaceae;g__Desulfovibrio; | 0.00058549  | 1.78E-07 | 0.00011287 | 0.00013<br>8431 | 1.17E-08 | 2.71E-05 | 0.000<br>999 | 0.023<br>876 |
| k__Bacteria;p__Firmicutes;c__Clostridia; o__Clostridiales;f__Ruminococcaceae; g__Oscillospira;                        | 0.000342574 | 1.39E-07 | 9.97E-05   | 6.98E-<br>05    | 1.57E-08 | 3.14E-05 | 0.002<br>997 | 0.044<br>768 |
| k__Bacteria;p__Firmicutes;c__Negativicutes; o__Selenomonadales; f__Veillonellaceae;g__Allisonella;                    | 0.00052445  | 2.01E-07 | 0.00011993 | 7.96E-<br>05    | 6.65E-09 | 2.04E-05 | 0.000<br>999 | 0.023<br>876 |

---

---

|                                                                                                                        |             |          |          |                 |          |          |              |              |
|------------------------------------------------------------------------------------------------------------------------|-------------|----------|----------|-----------------|----------|----------|--------------|--------------|
| k__Bacteria;p__Firmicutes;c__Clostridia;<br>o__Clostridiales;f__Ruminococcaceae;<br>g__Negativibacillus;               | 0.000450952 | 8.13E-08 | 7.62E-05 | 0.00013<br>6251 | 3.44E-08 | 4.63E-05 | 0.000<br>999 | 0.023<br>876 |
| k__Bacteria;p__Firmicutes;c__Clostridia;<br>o__Clostridiales;f__Ruminococcaceae; g__Fournierella;                      | 6.60E-05    | 6.23E-09 | 2.11E-05 | 1.20E-<br>05    | 5.97E-10 | 6.11E-06 | 0.001<br>998 | 0.034<br>109 |
| k__Bacteria;p__Proteobacteria;<br>c__Alphaproteobacteria;o__Sphingomonadales;<br>f__Sphingomonadaceae;g__Sphingomonas; | 4.98E-05    | 4.61E-10 | 5.74E-06 | 8.72E-<br>05    | 1.18E-09 | 8.57E-06 | 0.000<br>999 | 0.023<br>876 |

---

Supplementary Table 4. Spearman rank correlation between the microbes and the initial age of METH use, duration of METH use and age.

| phylum                        |             |                    |                    |                   |                  |                   |                           |                     |                   |                      |
|-------------------------------|-------------|--------------------|--------------------|-------------------|------------------|-------------------|---------------------------|---------------------|-------------------|----------------------|
| p value                       | Firmicu-tes | Proteobacte<br>ria | Actinobacteri<br>a | Bacteroidet<br>es | Fusobacteri<br>a | Euryarchae<br>ota | unidentifie<br>d_Bacteria | Verrucomic<br>robia | Acidoba<br>cteria | Gemmatimo<br>nadetes |
| initial age<br>of METH<br>use | 0.7558446   | 0.5954388          | 0.80198566         | 0.3736559         | 0.1487856        | 0.885448          | 0.7409473                 | 0.2544258           | 0.4173            | 0.89467126           |
| duration of<br>METH use       | 0.9691767   | 0.5078123          | 0.42775926         | 0.2412082         | 0.0163304        | 0.4309328         | 0.7375117                 | 0.5266131           | 0.34957           | 0.86454112           |
| age                           | 0.6072544   | 0.9392712          | 0.97395512         | 0.2031657         | 0.0289539        | 0.49822           | 0.9283455                 | 0.3129951           | 0.32894           | 0.92973199           |
| R                             |             |                    |                    |                   |                  |                   |                           |                     |                   |                      |
|                               | Firmicutes  | Proteobacte<br>ria | Actinobacteri<br>a | Bacteroidet<br>es | Fusobacteri<br>a | Euryarchae<br>ota | unidentifie<br>d_Bacteria | Verrucomic<br>robia | Acidoba<br>cteria | Gemmatimo<br>nadetes |
| initial age<br>of METH<br>use | -0.084447   | -0.143708          | 0.06815002         | -0.238525         | -0.378066        | -0.039181         | -0.089764                 | -0.302723           | -0.218            | -0.0360095           |
| duration of<br>METH use       | 0.0105128   | 0.1787182          | -0.2132603         | -0.31088          | -0.589152        | -0.211832         | 0.0909948                 | -0.170994           | -0.2504           | 0.04638946           |
| age                           | -0.139159   | 0.0207258          | -0.0088825         | -0.336055         | -0.545195        | -0.18271          | 0.0244629                 | -0.269388           | -0.261            | -0.0239884           |
| class                         |             |                    |                    |                   |                  |                   |                           |                     |                   |                      |

| p value                 | Clostridia | Gammaproteobacteria | Bacteroidia | unidentified_Actinobacteria | Coriobacteriia | Bacilli   | Negativicutes | Fusobacteriia | Erysipelotrichia | Methanobacteria |
|-------------------------|------------|---------------------|-------------|-----------------------------|----------------|-----------|---------------|---------------|------------------|-----------------|
| initial age of METH use | 0.4308763  | 0.5954388           | 0.37365591  | 0.9132576                   | 0.5726212      | 0.4508989 | 0.2361371     | 0.1487856     | 0.65005          | 0.88544797      |
| duration of METH use    | 0.5334778  | 0.5078123           | 0.2412082   | 0.198402                    | 0.9735785      | 0.0798815 | 0.3547822     | 0.0163304     | 0.70666          | 0.43093276      |
| age                     | 0.5032534  | 0.9392712           | 0.20316574  | 0.7106716                   | 0.9306139      | 0.2052882 | 0.634514      | 0.0289539     | 0.75187          | 0.49821995      |
| R                       | Clostridia | Gammaproteobacteria | Bacteroidia | unidentified_Actinobacteria | Coriobacteriia | Bacilli   | Negativicutes | Fusobacteriia | Erysipelotrichia | Methanobacteria |
| initial age of METH use | -0.211858  | -0.143708           | -0.2385251  | -0.02963                    | 0.1525968      | -0.202969 | 0.3140827     | -0.378066     | -0.123           | -0.0391814      |
| duration of METH use    | 0.1682053  | 0.1787182           | -0.3108795  | -0.339414                   | 0.009011       | -0.45055  | -0.247803     | -0.589152     | 0.10212          | -0.2118323      |
| age                     | -0.180611  | 0.0207258           | -0.3360548  | -0.100668                   | 0.0236867      | -0.334574 | 0.1287963     | -0.545195     | -0.0859          | -0.1827102      |
| order                   |            |                     |             |                             |                |           |               |               |                  |                 |

| p value                 | Clostridiales | Enterobacteriales | Bacteroidales | Bifidobacteriales | Coriobacteriales | Lactobacillales | Selenomonadales | Fusobacteriales | Erysipelotrichales | unidentified_Gammaproteobacteria |
|-------------------------|---------------|-------------------|---------------|-------------------|------------------|-----------------|-----------------|-----------------|--------------------|----------------------------------|
| initial age of METH use | 0.4308763     | 0.5954388         | 0.37365591    | 0.9565717         | 0.5726212        | 0.4508989       | 0.2361371       | 0.1487856       | 0.65005            | 0.22657193                       |
| duration of METH use    | 0.5334778     | 0.5078123         | 0.2412082     | 0.198402          | 0.9735785        | 0.0798815       | 0.3547822       | 0.0163304       | 0.70666            | 0.26806614                       |
| age                     | 0.5032534     | 0.9392712         | 0.20316574    | 0.7229568         | 0.9306139        | 0.2052882       | 0.634514        | 0.0289539       | 0.75187            | 0.12938019                       |
| R                       | Clostridiales | Enterobacteriales | Bacteroidales | Bifidobacteriales | Coriobacteriales | Lactobacillales | Selenomonadales | Fusobacteriales | Erysipelotrichales | unidentified_Gammaproteobacteria |
| initial age of METH use | -0.211858     | -0.143708         | -0.2385251    | -0.014815         | 0.1525968        | -0.202969       | 0.3140827       | -0.378066       | -0.123             | -0.3202443                       |
| duration of METH use    | 0.1682053     | 0.1787182         | -0.3108795    | -0.339414         | 0.009011         | -0.45055        | -0.247803       | -0.589152       | 0.10212            | -0.294576                        |
| age                     | -0.180611     | 0.0207258         | -0.3360548    | -0.096227         | 0.0236867        | -0.334574       | 0.1287963       | -0.545195       | -0.0859            | -0.3955625                       |

| family                         |                        |                     |                     |                    |                        |                           |                       |                      |                     |                      |
|--------------------------------|------------------------|---------------------|---------------------|--------------------|------------------------|---------------------------|-----------------------|----------------------|---------------------|----------------------|
| p value                        | Enterobacte<br>riaceae | Lachnospir<br>aceae | Ruminococc<br>aceae | Bacteroidac<br>eae | Bifidobacte<br>riaceae | Peptostrept<br>ococcaceae | Coriobacter<br>iaceae | Streptococc<br>aceae | Veillone<br>llaceae | Fusobacteria<br>ceae |
| initial age<br>of METH<br>use  | 0.5954388              | 0.9046185           | 0.98262227          | 0.4993759          | 0.9565717              | 0.654018                  | 0.5501807             | 0.4887861            | 0.20493             | 0.14878556           |
| duration of<br>METH use<br>age | 0.5078123              | 0.2317531           | 0.52977604          | 0.2974575          | 0.198402               | 0.9911916                 | 0.9647758             | 0.0880687            | 0.37311             | 0.01633044           |
| R                              | 0.9392712              | 0.7852844           | 0.89175927          | 0.3101511          | 0.7229568              | 0.7894878                 | 0.9652778             | 0.2388431            | 0.58047             | 0.02895391           |
| R                              | Enterobacte<br>riaceae | Lachnospir<br>aceae | Ruminococc<br>aceae | Bacteroidac<br>eae | Bifidobacte<br>riaceae | Peptostrept<br>ococcaceae | Coriobacter<br>iaceae | Streptococc<br>aceae | Veillone<br>llaceae | Fusobacteria<br>ceae |
| initial age<br>of METH<br>use  | -0.143708              | -0.032593           | 0.00592609          | -0.182227          | -0.014815              | -0.121485                 | 0.1614859             | -0.186672            | 0.33482             | -0.3780662           |
| duration of<br>METH use<br>age | 0.1787182              | 0.3168868           | 0.16970717          | -0.277839          | -0.339414              | 0.0030037                 | -0.012015             | -0.440037            | -0.2388             | -0.589152            |
|                                | 0.0207258              | 0.0740209           | -0.0370104          | -0.270916          | -0.096227              | -0.07254                  | 0.0118433             | -0.312368            | 0.14952             | -0.5451948           |

genus

| p value                       | unidentifie<br>d_Enteroba<br>cteriaceae | unidentifie<br>d_Ruminoc<br>occaceae | Bacteroides | Bifidobacte<br>rium | Blautia   | Romboutsi<br>a | Collinsella | Faecalibact<br>erium | unidenti<br>fied_La<br>chnospir<br>aceae | Streptococc<br>us |
|-------------------------------|-----------------------------------------|--------------------------------------|-------------|---------------------|-----------|----------------|-------------|----------------------|------------------------------------------|-------------------|
| initial age<br>of METH<br>use | 0.9956553                               | 0.654018                             | 0.49937588  | 0.9565717           | 0.3645463 | 0.7516856      | 0.5501807   | 0.9478961            | 0.22467                                  | 0.48878611        |
| duration of<br>METH use       | 0.4479855                               | 0.4686832                            | 0.29745751  | 0.198402            | 0.3793278 | 0.7316072      | 0.9647758   | 0.6216543            | 0.85971                                  | 0.08806874        |
| age                           | 0.5320905                               | 0.6903453                            | 0.31015105  | 0.7229568           | 0.2807905 | 1              | 0.9652778   | 0.857412             | 0.25806                                  | 0.23884307        |
| R                             | unidentifie<br>d_Enteroba<br>cteriaceae | unidentifie<br>d_Ruminoc<br>occaceae | Bacteroides | Bifidobacte<br>rium | Blautia   | Romboutsi<br>a | Collinsella | Faecalibact<br>erium | unidenti<br>fied_La<br>chnospir<br>aceae | Streptococc<br>us |
| initial age<br>of METH<br>use | 0.0014815                               | 0.1214848                            | -0.1822272  | -0.014815           | 0.2429696 | -0.085928      | 0.1614859   | -0.017778            | 0.32149                                  | -0.1866718        |
| duration of<br>METH use       | 0.2042493                               | -0.195238                            | -0.2778392  | -0.339414           | 0.2357878 | 0.0931137      | -0.012015   | 0.1336632            | 0.04806                                  | -0.4400372        |
| age                           | 0.1687676                               | -0.10807                             | -0.2709164  | -0.096227           | 0.287201  | 0              | 0.0118433   | -0.048854            | 0.30052                                  | -0.3123681        |

correlation coefficient  $-1 < R < 1$ ,  $R > 0$  positive correlation,  $R < 0$  negative correlation.



Supplementary Table 5. Results of PANSS and MoCA tests.

| Samples | Delusions | Conceptual<br>disorganization | Hallucinatory<br>behavior | Excitement | Grandiosity | Suspiciousness | Hostility | Positive<br>Scale |
|---------|-----------|-------------------------------|---------------------------|------------|-------------|----------------|-----------|-------------------|
| FB1     | 3         | 3                             | 3                         | 7          | 3           | 4              | 7         | 30                |
| FB2     | 2         | 1                             | 3                         | 3          | 1           | 4              | 3         | 17                |
| FB3     | 4         | 6                             | 3                         | 3          | 1           | 4              | 3         | 24                |
| FB4     | 2         | 3                             | 2                         | 1          | 1           | 4              | 2         | 15                |
| FB5     | 3         | 4                             | 3                         | 6          | 1           | 4              | 6         | 27                |
| FB6     | 2         | 3                             | 2                         | 6          | 1           | 3              | 6         | 23                |
| FB7     | 2         | 3                             | 2                         | 5          | 1           | 3              | 5         | 21                |
| FB8     | 4         | 3                             | 3                         | 6          | 1           | 5              | 6         | 28                |
| FB13    | 6         | 5                             | 3                         | 7          | 1           | 5              | 7         | 34                |
| FB14    | 5         | 4                             | 4                         | 6          | 1           | 5              | 6         | 31                |
| FB15    | 4         | 3                             | 3                         | 3          | 1           | 5              | 5         | 24                |
| FB16    | 6         | 3                             | 6                         | 6          | 1           | 5              | 5         | 32                |
| FB17    | 6         | 3                             | 3                         | 6          | 1           | 6              | 5         | 30                |
| FB19    | 5         | 3                             | 3                         | 4          | 1           | 6              | 4         | 26                |
| FB20    | 5         | 2                             | 6                         | 5          | 1           | 6              | 5         | 30                |
| FB12    | 5         | 3                             | 3                         | 5          | 1           | 5              | 5         | 27                |

| Samples | Blunted affect | Emotional withdrawal | Poor rapport | Passive-<br>apathetic<br>social<br>withdrawal | Difficulty<br>in<br>abstract<br>thinking | Lack of<br>spontaneity<br>& flow of<br>conversation | Stereotyped<br>thinking | Negative<br>Scale |
|---------|----------------|----------------------|--------------|-----------------------------------------------|------------------------------------------|-----------------------------------------------------|-------------------------|-------------------|
| FB1     | 2              | 5                    | 4            | 5                                             | 4                                        | 3                                                   | 1                       | 24                |
| FB2     | 2              | 4                    | 3            | 3                                             | 4                                        | 4                                                   | 1                       | 21                |
| FB3     | 5              | 4                    | 5            | 5                                             | 5                                        | 6                                                   | 1                       | 31                |
| FB4     | 3              | 5                    | 3            | 5                                             | 4                                        | 5                                                   | 1                       | 26                |
| FB5     | 1              | 3                    | 3            | 3                                             | 4                                        | 4                                                   | 1                       | 19                |
| FB6     | 1              | 3                    | 3            | 3                                             | 2                                        | 3                                                   | 1                       | 16                |
| FB7     | 1              | 3                    | 3            | 3                                             | 2                                        | 3                                                   | 1                       | 16                |
| FB8     | 3              | 3                    | 3            | 3                                             | 3                                        | 3                                                   | 1                       | 19                |
| FB13    | 1              | 2                    | 3            | 1                                             | 5                                        | 1                                                   | 1                       | 14                |
| FB14    | 3              | 3                    | 3            | 3                                             | 3                                        | 3                                                   | 1                       | 19                |
| FB15    | 3              | 3                    | 3            | 2                                             | 3                                        | 3                                                   | 1                       | 18                |
| FB16    | 2              | 2                    | 3            | 3                                             | 4                                        | 3                                                   | 1                       | 18                |
| FB17    | 3              | 2                    | 3            | 3                                             | 4                                        | 3                                                   | 1                       | 19                |
| FB19    | 1              | 1                    | 1            | 1                                             | 1                                        | 1                                                   | 1                       | 7                 |
| FB20    | 2              | 2                    | 2            | 2                                             | 3                                        | 2                                                   | 1                       | 14                |
| FB12    | 2              | 2                    | 2            | 2                                             | 3                                        | 3                                                   | 1                       | 15                |

| Samples | Somatic concern | Anxiety | Guilt feelings | Tension | Mannerisms & posturing | Depression | Motor retardation | UncooperatJveness |
|---------|-----------------|---------|----------------|---------|------------------------|------------|-------------------|-------------------|
| FB1     | 1               | 5       | 1              | 5       | 1                      | 1          | 1                 | 6                 |
| FB2     | 3               | 4       | 3              | 3       | 1                      | 5          | 3                 | 2                 |
| FB3     | 1               | 1       | 1              | 1       | 1                      | 1          | 4                 | 4                 |
| FB4     | 2               | 5       | 2              | 5       | 1                      | 5          | 4                 | 3                 |
| FB5     | 1               | 4       | 1              | 4       | 1                      | 2          | 1                 | 6                 |
| FB6     | 1               | 4       | 1              | 4       | 1                      | 1          | 1                 | 6                 |
| FB7     | 1               | 3       | 1              | 4       | 1                      | 1          | 1                 | 5                 |
| FB8     | 1               | 4       | 1              | 4       | 1                      | 1          | 1                 | 6                 |
| FB13    | 1               | 6       | 1              | 5       | 1                      | 2          | 1                 | 6                 |
| FB14    | 1               | 5       | 1              | 4       | 1                      | 1          | 1                 | 6                 |
| FB15    | 1               | 3       | 1              | 3       | 1                      | 1          | 1                 | 5                 |
| FB16    | 1               | 4       | 1              | 4       | 1                      | 1          | 1                 | 6                 |
| FB17    | 1               | 4       | 1              | 4       | 1                      | 1          | 1                 | 5                 |
| FB19    | 1               | 3       | 1              | 3       | 1                      | 1          | 1                 | 4                 |
| FB20    | 1               | 4       | 1              | 3       | 1                      | 1          | 1                 | 5                 |
| FB12    | 1               | 4       | 1              | 3       | 1                      | 1          | 1                 | 6                 |

| Samples | Unusual<br>thought<br>content | Disorientation | Poor<br>attention | Lack of<br>judgment &<br>insight | Disturbance<br>of volition | Poor<br>impulse<br>control | Preoccupation | Active<br>social<br>avoidance | General<br>Psychopathology<br>Scale |
|---------|-------------------------------|----------------|-------------------|----------------------------------|----------------------------|----------------------------|---------------|-------------------------------|-------------------------------------|
| FB1     | 2                             | 1              | 5                 | 6                                | 3                          | 5                          | 1             | 4                             | 48                                  |
| FB2     | 1                             | 1              | 4                 | 5                                | 5                          | 3                          | 1             | 4                             | 48                                  |
| FB3     | 3                             | 1              | 5                 | 6                                | 5                          | 2                          | 1             | 6                             | 43                                  |
| FB4     | 1                             | 1              | 4                 | 4                                | 4                          | 2                          | 1             | 5                             | 49                                  |
| FB5     | 1                             | 1              | 5                 | 6                                | 1                          | 6                          | 1             | 4                             | 45                                  |
| FB6     | 1                             | 1              | 5                 | 5                                | 1                          | 6                          | 1             | 3                             | 42                                  |
| FB7     | 1                             | 1              | 4                 | 5                                | 1                          | 5                          | 1             | 4                             | 39                                  |
| FB8     | 1                             | 1              | 5                 | 6                                | 2                          | 6                          | 1             | 5                             | 46                                  |
| FB13    | 3                             | 1              | 7                 | 7                                | 1                          | 7                          | 1             | 5                             | 55                                  |
| FB14    | 2                             | 1              | 5                 | 5                                | 4                          | 6                          | 1             | 4                             | 48                                  |
| FB15    | 1                             | 1              | 5                 | 5                                | 4                          | 4                          | 1             | 3                             | 40                                  |
| FB16    | 4                             | 1              | 5                 | 6                                | 1                          | 6                          | 1             | 4                             | 47                                  |
| FB17    | 3                             | 1              | 5                 | 6                                | 2                          | 6                          | 1             | 4                             | 46                                  |
| FB19    | 3                             | 1              | 4                 | 5                                | 1                          | 5                          | 1             | 3                             | 38                                  |
| FB20    | 3                             | 1              | 4                 | 5                                | 2                          | 5                          | 1             | 3                             | 41                                  |
| FB12    | 3                             | 1              | 2                 | 6                                | 3                          | 6                          | 1             | 3                             | 43                                  |

| Samples | visuospatial<br>executive | naming | attention | calculation | language | abstraction | delayed<br>recall | orientation | total<br>MoCA |
|---------|---------------------------|--------|-----------|-------------|----------|-------------|-------------------|-------------|---------------|
|---------|---------------------------|--------|-----------|-------------|----------|-------------|-------------------|-------------|---------------|

|      |   |   |   |   |   |   |   |   |    |
|------|---|---|---|---|---|---|---|---|----|
| FB1  | 4 | 3 | 3 | 3 | 2 | 3 | 3 | 6 | 27 |
| FB2  | 4 | 3 | 3 | 1 | 2 | 2 | 5 | 6 | 26 |
| FB3  | 5 | 3 | 3 | 3 | 3 | 1 | 1 | 6 | 25 |
| FB4  | 4 | 3 | 2 | 3 | 2 | 2 | 1 | 6 | 23 |
| FB5  | 5 | 2 | 2 | 3 | 1 | 1 | 0 | 6 | 20 |
| FB6  | 4 | 3 | 3 | 1 | 3 | 2 | 0 | 6 | 22 |
| FB7  | 3 | 3 | 3 | 3 | 3 | 2 | 4 | 6 | 27 |
| FB8  | 3 | 2 | 3 | 3 | 1 | 1 | 3 | 6 | 22 |
| FB13 | 3 | 3 | 3 | 3 | 2 | 2 | 5 | 6 | 27 |
| FB14 | 4 | 3 | 2 | 3 | 1 | 1 | 2 | 6 | 22 |
| FB15 | 4 | 3 | 3 | 2 | 2 | 2 | 1 | 6 | 23 |
| FB16 | 3 | 3 | 3 | 3 | 2 | 1 | 2 | 6 | 23 |
| FB17 | 4 | 3 | 3 | 3 | 2 | 2 | 2 | 6 | 25 |
| FB19 | 5 | 3 | 3 | 3 | 3 | 2 | 3 | 6 | 28 |
| FB20 | 4 | 3 | 2 | 3 | 3 | 2 | 2 | 6 | 25 |
| FB12 | 5 | 3 | 3 | 3 | 2 | 1 | 2 | 6 | 25 |

FB belong to the METH group, FBC belong to the Ctr group.  
 Lower scores indicate less severe symptoms.

Supplementary Table 6. Spearman rank correlation between the microbes and the scales of PNASS and MoCA tests.

positive scale

| R                          | unidentified_Enterobacteriaceae | unidentified_Ruminococcaceae | Bacteroides | Bifidobacterium | Blautia | Romboutsia | Collinsella | Faecalibacterium | unidentified_Lachnospiraceae | Streptococcus |
|----------------------------|---------------------------------|------------------------------|-------------|-----------------|---------|------------|-------------|------------------|------------------------------|---------------|
| Delusions                  | 0.6162                          | -0.4885                      | 0.5230      | -0.3667         | -0.0240 | -0.4569    | -0.1323     | -0.2435          | 0.2450                       | -0.0240       |
| Conceptual disorganization | 0.0152                          | -0.0744                      | 0.2131      | -0.0406         | 0.1675  | -0.0660    | -0.1235     | -0.3045          | 0.2774                       | 0.1793        |
| Hallucinatory behavior     | 0.3855                          | -0.1189                      | 0.1240      | -0.2241         | 0.0458  | -0.1392    | -0.0696     | -0.0560          | 0.1511                       | 0.3447        |
| Excitement                 | 0.3619                          | -0.3969                      | 0.1718      | -0.3543         | 0.0715  | 0.0791     | -0.2281     | -0.0547          | 0.1566                       | -0.0745       |
| Grandiosity                | 0.3081                          | -0.3641                      | -0.3081     | 0.0840          | 0.4201  | 0.3081     | -0.1960     | -0.3641          | 0.3641                       | 0.0840        |
| Suspiciousness             | 0.5683                          | -0.4697                      | 0.4482      | -0.3157         | -0.0370 | -0.3958    | -0.0662     | -0.0801          | 0.1710                       | -0.1679       |
| Hostility                  | 0.2881                          | -0.3506                      | 0.0412      | -0.3597         | 0.1692  | 0.2317     | -0.1753     | -0.0290          | 0.1494                       | -0.2012       |
| Positive Scale             | 0.6204                          | -0.5067                      | 0.2836      | -0.3811         | 0.1152  | -0.1891    | -0.2496     | -0.2245          | 0.3117                       | 0.1211        |

| p value                    | unidentified_Enterobacteriaceae | unidentified_Ruminococcaceae | Bacteroides | Bifidobacterium | Blautia | Romboutsia | Collinsella | Faecalibacterium | unidentified_Lachnospiraceae | Streptococcus |
|----------------------------|---------------------------------|------------------------------|-------------|-----------------|---------|------------|-------------|------------------|------------------------------|---------------|
| Delusions                  | 0.0110                          | 0.0549                       | 0.0376      | 0.1624          | 0.9296  | 0.0752     | 0.6253      | 0.3635           | 0.3605                       | 0.9296        |
| Conceptual disorganization | 0.9554                          | 0.7841                       | 0.4281      | 0.8813          | 0.5353  | 0.8082     | 0.6487      | 0.2516           | 0.2983                       | 0.5064        |
| Hallucinatory behavior     | 0.1404                          | 0.6611                       | 0.6474      | 0.4040          | 0.8661  | 0.6070     | 0.7978      | 0.8367           | 0.5764                       | 0.1910        |
| Excitement                 | 0.1684                          | 0.1280                       | 0.5246      | 0.1782          | 0.7925  | 0.7710     | 0.3955      | 0.8404           | 0.5624                       | 0.7839        |
| Grandiosity                | 0.2457                          | 0.1657                       | 0.2457      | 0.7571          | 0.1052  | 0.2457     | 0.4668      | 0.1657           | 0.1657                       | 0.7571        |
| Suspiciousness             | 0.0216                          | 0.0664                       | 0.0817      | 0.2336          | 0.8919  | 0.1291     | 0.8075      | 0.7681           | 0.5267                       | 0.5343        |
| Hostility                  | 0.2793                          | 0.1831                       | 0.8797      | 0.1712          | 0.5311  | 0.3879     | 0.5161      | 0.9152           | 0.5809                       | 0.4549        |
| Positive Scale             | 0.0103                          | 0.0452                       | 0.2871      | 0.1453          | 0.6709  | 0.4831     | 0.3511      | 0.4032           | 0.2399                       | 0.6550        |

The negative scale

| R                                                   | unidentified_Enterobacteriaceae | unidentified_Ruminococcaceae | Bacteroides | Bifidobacterium | Blautia | Romboutsia | Collinsella | Faecalibacterium | unidentified_Lachnospiraceae | Streptococcus |
|-----------------------------------------------------|---------------------------------|------------------------------|-------------|-----------------|---------|------------|-------------|------------------|------------------------------|---------------|
| Blunted affect                                      | -0.1109                         | 0.0832                       | -0.1386     | 0.5698          | 0.1725  | -0.2495    | 0.0770      | -0.3481          | 0.0647                       | 0.3881        |
| Emotional withdrawal                                | -0.4747                         | 0.3518                       | -0.6192     | 0.5608          | 0.2658  | 0.3411     | 0.0046      | -0.2151          | 0.0384                       | 0.4148        |
| Poor rapport                                        | -0.3204                         | 0.2452                       | -0.4367     | 0.5817          | 0.4493  | 0.2041     | 0.1002      | -0.4511          | 0.3132                       | 0.3490        |
| Passive-<br>apathetic social<br>withdrawal          | -0.4242                         | 0.3213                       | -0.3767     | 0.6521          | 0.1551  | 0.1219     | 0.0032      | -0.1361          | 0.0142                       | 0.5682        |
| Difficulty in<br>abstract<br>thinking               | -0.0338                         | -0.0676                      | -0.0369     | 0.2212          | 0.3011  | -0.3503    | -0.2397     | -0.5101          | 0.5009                       | 0.5485        |
| Lack of<br>spontaneity &<br>flow of<br>conversation | -0.7143                         | 0.5373                       | -0.2078     | 0.5942          | -0.0179 | -0.1120    | 0.0536      | 0.0260           | -0.1753                      | 0.5649        |
| Stereotyped<br>thinking                             | NA                              | NA                           | NA          | NA              | NA      | NA         | NA          | NA               | NA                           | NA            |
| Negative Scale                                      | -0.4529                         | 0.2970                       | -0.3415     | 0.6504          | 0.1930  | -0.0059    | -0.0297     | -0.2702          | 0.0564                       | 0.6162        |
| p value                                             | unidentified_Enterobacteriaceae | unidentified_Ruminococcaceae | Bacteroides | Bifidobacterium | Blautia | Romboutsia | Collinsella | Faecalibacterium | unidentified_Lachnospiraceae | Streptococcus |
| Blunted affect                                      | 0.6827                          | 0.7594                       | 0.6087      | 0.0212          | 0.5229  | 0.3514     | 0.7768      | 0.1865           | 0.8119                       | 0.1374        |



|                                                     |        |        |        |        |        |        |        |        |        |        |
|-----------------------------------------------------|--------|--------|--------|--------|--------|--------|--------|--------|--------|--------|
| Emotional withdrawal                                | 0.0631 | 0.1814 | 0.0105 | 0.0238 | 0.3197 | 0.1961 | 0.9865 | 0.4237 | 0.8877 | 0.1101 |
| Poor rapport                                        | 0.2263 | 0.3600 | 0.0908 | 0.0181 | 0.0808 | 0.4484 | 0.7119 | 0.0795 | 0.2375 | 0.1852 |
| Passive-<br>apathetic social<br>withdrawal          | 0.1015 | 0.2249 | 0.1504 | 0.0062 | 0.5662 | 0.6530 | 0.9907 | 0.6152 | 0.9582 | 0.0217 |
| Difficulty in<br>abstract<br>thinking               | 0.9011 | 0.8036 | 0.8922 | 0.4103 | 0.2571 | 0.1835 | 0.3713 | 0.0435 | 0.0481 | 0.0278 |
| Lack of<br>spontaneity &<br>flow of<br>conversation | 0.0019 | 0.0318 | 0.4400 | 0.0152 | 0.9477 | 0.6796 | 0.8438 | 0.9239 | 0.5160 | 0.0226 |
| Stereotyped<br>thinking                             | NA     | NA     | NA     | NA     | NA     | NA     | NA     | NA     | NA     | NA     |
| Negative Scale                                      | 0.0781 | 0.2640 | 0.1955 | 0.0064 | 0.4738 | 0.9826 | 0.9131 | 0.3114 | 0.8356 | 0.0110 |

---

the general psychopathology scale

---

|   |                                 |                              |             |                 |         |            |             |                  |                              |               |
|---|---------------------------------|------------------------------|-------------|-----------------|---------|------------|-------------|------------------|------------------------------|---------------|
| R | unidentified_Enterobacteriaceae | unidentified_Ruminococcaceae | Bacteroides | Bifidobacterium | Blautia | Romboutsia | Collinsella | Faecalibacterium | unidentified_Lachnospiraceae | Streptococcus |
|---|---------------------------------|------------------------------|-------------|-----------------|---------|------------|-------------|------------------|------------------------------|---------------|

---

|                            |         |         |         |         |         |         |         |         |         |         |
|----------------------------|---------|---------|---------|---------|---------|---------|---------|---------|---------|---------|
| Somatic concern            | -0.3017 | 0.2301  | -0.3017 | 0.1892  | -0.2096 | -0.0205 | -0.1508 | -0.1074 | -0.1815 | 0.4014  |
| Anxiety                    | 0.3890  | -0.4713 | -0.0269 | -0.3732 | -0.0127 | -0.0127 | -0.4855 | -0.3384 | 0.1755  | 0.3384  |
| Guilt feelings             | -0.3017 | 0.2301  | -0.3017 | 0.1892  | -0.2096 | -0.0205 | -0.1508 | -0.1074 | -0.1815 | 0.4014  |
| Tension                    | 0.2380  | -0.4321 | -0.0282 | -0.0219 | 0.0720  | -0.0125 | -0.3476 | -0.2943 | 0.2004  | 0.1566  |
| Mannerisms & posturing     | NA      | NA      | NA      | NA      | NA      | NA      | NA      | NA      | NA      | NA      |
| Depression                 | -0.2440 | 0.0659  | -0.0813 | -0.0697 | -0.0930 | -0.1433 | -0.3022 | -0.1046 | 0.0775  | 0.3486  |
| Motor retardation          | -0.3803 | 0.3738  | -0.3068 | 0.4624  | 0.0043  | -0.0411 | -0.0583 | -0.2485 | 0.0540  | 0.5099  |
| Uncooperativeness          | 0.3298  | -0.3805 | 0.3298  | -0.3266 | -0.1459 | -0.0539 | -0.3155 | 0.0666  | -0.0967 | -0.0111 |
| Unusual thought content    | 0.6057  | -0.3827 | 0.4033  | -0.3005 | -0.0016 | -0.3448 | -0.1502 | -0.2625 | 0.3084  | 0.1154  |
| Disorientation             | NA      | NA      | NA      | NA      | NA      | NA      | NA      | NA      | NA      | NA      |
| Poor attention             | 0.0891  | -0.1155 | 0.0660  | 0.1023  | 0.3466  | 0.0495  | 0.0660  | -0.4588 | 0.4522  | -0.0132 |
| Lack of judgment & insight | 0.2832  | -0.4023 | 0.4087  | -0.0772 | 0.0290  | -0.4344 | -0.3958 | -0.1513 | 0.2124  | 0.0869  |
| Disturbance of volition    | -0.2328 | 0.2359  | -0.4246 | 0.3272  | 0.2009  | 0.0578  | 0.0609  | -0.3394 | 0.0061  | 0.3972  |
| Poor impulse control       | 0.3206  | -0.3764 | 0.5220  | -0.5452 | -0.3005 | -0.2122 | -0.2540 | 0.1595  | -0.1549 | -0.1719 |
| Preoccupation              | NA      | NA      | NA      | NA      | NA      | NA      | NA      | NA      | NA      | NA      |
| Active social avoidance    | -0.1065 | -0.0031 | -0.1597 | 0.4697  | 0.0595  | -0.2035 | -0.3789 | -0.3162 | 0.1659  | 0.5730  |

|                                  |        |         |         |         |         |         |         |         |        |        |
|----------------------------------|--------|---------|---------|---------|---------|---------|---------|---------|--------|--------|
| General<br>Psychopathology Scale | 0.1861 | -0.2821 | -0.0812 | -0.0266 | -0.0414 | -0.1654 | -0.5037 | -0.5022 | 0.1492 | 0.6174 |
|----------------------------------|--------|---------|---------|---------|---------|---------|---------|---------|--------|--------|

---

| p value         | unidentified_Enterobacteriaceae | unidentified_Ruminococcaceae | Bacteroides | Bifidobacterium | Blautia | Romboutsia | Collinsella | Faecalibacterium | unidentified_Lachnospiraceae | Streptococcus |
|-----------------|---------------------------------|------------------------------|-------------|-----------------|---------|------------|-------------|------------------|------------------------------|---------------|
| Somatic concern | 0.2562                          | 0.3913                       | 0.2562      | 0.4828          | 0.4358  | 0.9401     | 0.5771      | 0.6922           | 0.5011                       | 0.1233        |

|                                  |        |        |        |        |        |        |        |        |        |        |
|----------------------------------|--------|--------|--------|--------|--------|--------|--------|--------|--------|--------|
| Anxiety                          | 0.1364 | 0.0654 | 0.9213 | 0.1545 | 0.9629 | 0.9629 | 0.0566 | 0.1998 | 0.5155 | 0.1998 |
| Guilt feelings                   | 0.2562 | 0.3913 | 0.2562 | 0.4828 | 0.4358 | 0.9401 | 0.5771 | 0.6922 | 0.5011 | 0.1233 |
| Tension                          | 0.3748 | 0.0946 | 0.9175 | 0.9358 | 0.7910 | 0.9633 | 0.1872 | 0.2685 | 0.4568 | 0.5626 |
| Mannerisms &<br>posturing        | NA     | NA     | NA     | NA     | NA     | NA     | NA     | NA     | NA     | NA     |
| Depression                       | 0.3624 | 0.8085 | 0.7646 | 0.7975 | 0.7320 | 0.5964 | 0.2554 | 0.6999 | 0.7755 | 0.1857 |
| Motor<br>retardation             | 0.1462 | 0.1538 | 0.2477 | 0.0713 | 0.9873 | 0.8800 | 0.8301 | 0.3534 | 0.8425 | 0.0436 |
| Uncooperat<br>iveness            | 0.2123 | 0.1460 | 0.2123 | 0.2169 | 0.5899 | 0.8428 | 0.2339 | 0.8064 | 0.7216 | 0.9675 |
| Unusual<br>thought content       | 0.0129 | 0.1435 | 0.1214 | 0.2581 | 0.9954 | 0.1910 | 0.5786 | 0.3260 | 0.2452 | 0.6703 |
| Disorientation                   | NA     | NA     | NA     | NA     | NA     | NA     | NA     | NA     | NA     | NA     |
| Poor attention                   | 0.7428 | 0.6701 | 0.8081 | 0.7061 | 0.1885 | 0.8555 | 0.8081 | 0.0739 | 0.0787 | 0.9613 |
| Lack of<br>judgment &<br>insight | 0.2879 | 0.1224 | 0.1160 | 0.7762 | 0.9152 | 0.0927 | 0.1291 | 0.5761 | 0.4297 | 0.7490 |
| Disturbance of<br>volition       | 0.3855 | 0.3791 | 0.1012 | 0.2161 | 0.4557 | 0.8315 | 0.8228 | 0.1985 | 0.9821 | 0.1277 |
| Poor impulse<br>control          | 0.2260 | 0.1508 | 0.0381 | 0.0290 | 0.2581 | 0.4301 | 0.3424 | 0.5551 | 0.5668 | 0.5243 |
| Preoccupation                    | NA     | NA     | NA     | NA     | NA     | NA     | NA     | NA     | NA     | NA     |
| Active social<br>avoidance       | 0.6948 | 0.9908 | 0.5547 | 0.0664 | 0.8268 | 0.4496 | 0.1479 | 0.2328 | 0.5391 | 0.0203 |

|                                  |        |        |        |        |        |        |        |        |        |        |
|----------------------------------|--------|--------|--------|--------|--------|--------|--------|--------|--------|--------|
| General<br>Psychopathology Scale | 0.4901 | 0.2897 | 0.7649 | 0.9221 | 0.8791 | 0.5403 | 0.0467 | 0.0474 | 0.5813 | 0.0108 |
|----------------------------------|--------|--------|--------|--------|--------|--------|--------|--------|--------|--------|

---

MoCA

|   |                                 |                              |             |                 |         |            |             |                  |                              |               |
|---|---------------------------------|------------------------------|-------------|-----------------|---------|------------|-------------|------------------|------------------------------|---------------|
| R | unidentified_Enterobacteriaceae | unidentified_Ruminococcaceae | Bacteroides | Bifidobacterium | Blautia | Romboutsia | Collinsella | Faecalibacterium | unidentified_Lachnospiraceae | Streptococcus |
|---|---------------------------------|------------------------------|-------------|-----------------|---------|------------|-------------|------------------|------------------------------|---------------|

---

|                        |         |         |         |         |         |         |         |         |         |         |
|------------------------|---------|---------|---------|---------|---------|---------|---------|---------|---------|---------|
| visuospatial executive | -0.1917 | 0.2109  | 0.2684  | -0.1917 | 0.0192  | -0.0192 | 0.0959  | 0.1342  | 0.0383  | -0.0192 |
| naming                 | 0.2460  | 0.0820  | -0.2870 | -0.2050 | 0.2460  | 0.2460  | 0.3280  | -0.4920 | 0.2460  | -0.1230 |
| attention              | 0.1566  | -0.1566 | 0.1252  | 0.1566  | -0.1252 | -0.0626 | 0.0000  | -0.2192 | -0.1252 | -0.4070 |
| calculation            | 0.4127  | -0.4559 | 0.2658  | -0.0259 | 0.0238  | -0.3889 | -0.4473 | 0.0194  | 0.1880  | 0.3435  |
| language               | 0.0032  | 0.2934  | -0.2181 | -0.0016 | 0.1876  | 0.3351  | 0.4169  | 0.0545  | 0.2197  | -0.4313 |
| abstraction            | 0.1423  | -0.1339 | -0.4435 | -0.0921 | 0.5021  | 0.4184  | 0.2678  | -0.3096 | 0.4603  | -0.4770 |
| delayed recall         | 0.3790  | -0.2978 | -0.2497 | -0.2377 | -0.0707 | 0.1248  | -0.3460 | -0.0692 | -0.1173 | -0.0391 |
| orientation            | NA      | NA      | NA      | NA      | NA      | NA      | NA      | NA      | NA      | NA      |
| total MoCA             | 0.3722  | -0.2078 | -0.2183 | -0.2257 | 0.2452  | 0.1495  | -0.0688 | -0.2467 | 0.2706  | -0.2541 |

| p value                | unidentified_Enterobacteriaceae | unidentified_Ruminococcaceae | Bacteroides | Bifidobacterium | Blautia | Romboutsia | Collinsella | Faecalibacterium | unidentified_Lachnospiraceae | Streptococcus |
|------------------------|---------------------------------|------------------------------|-------------|-----------------|---------|------------|-------------|------------------|------------------------------|---------------|
| visuospatial executive | 0.4768                          | 0.4330                       | 0.3148      | 0.4768          | 0.9438  | 0.9438     | 0.7239      | 0.6202           | 0.8879                       | 0.9438        |

|                |        |        |        |        |        |        |        |        |        |        |
|----------------|--------|--------|--------|--------|--------|--------|--------|--------|--------|--------|
| naming         | 0.3585 | 0.7627 | 0.2812 | 0.4463 | 0.3585 | 0.3585 | 0.2149 | 0.0529 | 0.3585 | 0.6500 |
| attention      | 0.5626 | 0.5626 | 0.6440 | 0.5626 | 0.6440 | 0.8178 | 1.0000 | 0.4147 | 0.6440 | 0.1176 |
| calculation    | 0.1121 | 0.0759 | 0.3198 | 0.9241 | 0.9304 | 0.1365 | 0.0824 | 0.9430 | 0.4857 | 0.1926 |
| language       | 0.9906 | 0.2700 | 0.4172 | 0.9953 | 0.4866 | 0.2045 | 0.1082 | 0.8411 | 0.4137 | 0.0953 |
| abstraction    | 0.5992 | 0.6211 | 0.0853 | 0.7346 | 0.0475 | 0.1068 | 0.3160 | 0.2432 | 0.0728 | 0.0617 |
| delayed recall | 0.1477 | 0.2626 | 0.3510 | 0.3755 | 0.7947 | 0.6450 | 0.1893 | 0.7990 | 0.6652 | 0.8857 |
| orientation    | NA     | NA     | NA     | NA     | NA     | NA     | NA     | NA     | NA     | NA     |
| total MoCA     | 0.1557 | 0.4400 | 0.4167 | 0.4005 | 0.3601 | 0.5805 | 0.8002 | 0.3571 | 0.3108 | 0.3422 |

correlation coefficient  $-1 < R < 1$ ,  $R > 0$  positive correlation,  $R < 0$  negative correlation.
